# Supplementary material for: The mutational landscape of ocular marginal zone lymphoma identifies frequent alterations in TNFAIP3 followed by mutations in TBL1XR1 and CREBBP
Source: PubMed Central journal article supplement (PMC5370020; doi:10.18632/oncotarget.14928), 2017-02-04
Supplement: oncotarget-08-17038-s001.pdf [file oncotarget-08-17038-s001.pdf]

## The mutational landscape of ocular marginal zone lymphoma identifies frequent alterations in *TNFAIP3* followed by mutations in *TBL1XR1* and *CREBBP*

### SUPPLEMENTARY DATA

#### DNA and RNA extraction from frozen tumor samples

Tumor DNA (n=10) was extracted using the QIAamp DNA Mini kit (Qiagen, Valencia, CA, USA), according to the manufacturer's protocol. Control DNA from matched peripheral blood samples was extracted with the QIAamp DNA Blood Maxi Kit (Qiagen, Valencia, CA, USA). DNA quality and quantity were analyzed using Nanodrop 8000 UV-Vis spectrometer (NanoDrop Technologies Inc), Qubit® 2.0 Fluorometer (Life technologies Inc), and 2200 TapeStation Instrument (Agilent Technologies, Santa Clara, CA, USA).

The same frozen tumor samples were used for RNA extraction using a Qiagen RNeasy Mini Kit (Qiagen, Valencia, CA, USA). RNA quality and quantity were assessed by Nanodrop 8000 UV-Vis spectrometer (NanoDrop Technologies Inc. <http://www.nanodrop.com>) and Agilent 2100 Bioanalyzer Lab-on-a-Chip instrument system (Agilent Technologies, Santa Clara, CA, USA).

#### DNA extraction from formalin fixation and Paraffin embedding (FFPE) tumor samples

Tumor FFPE tissue DNA was extracted using Maxwell 16 CSC DNA FFPE Kit (Promega Corporation, Madison, USA). DNA quantity and quality were assessed by the same protocol.

#### Bioinformatics analysis

##### DNA and RNA data processing

Reads from whole-genome sequencing (WGS) were aligned against the hg19 reference genome using Burrows-Wheeler Aligner (BWA) 0.6.2 [1] and PCR duplicates were marked using Picard (see URLs). The Genome Analysis Toolkit (GATK) [2] was used for the quality score recalibration and local realignment. The same procedure was applied to process reads from Targeted-seq. RSEM [3] was used to align RNA-seq reads against the hg19 reference genome and quantify gene expression level based on UCSC gene model [4]. Picard was used to calculate read alignment statistics. Raw Agilent expression microarray data were preprocessed using GeneSpring

GX 13.0 with default options (Agilent Technologies). The natural scale normalized data were further log<sub>2</sub> normalized to the control sample (*i.e.*, cell line transfected with empty vector). The normalized probes were collapsed to gene symbols using the CollapseDataset function ("max probe") in GSEA [5].

##### Somatic variant detection in WGS data

We called somatic single nucleotide variants (SNVs) and indels in WGS data using Strelka [6] and muTect [7] with default settings and then the detected variants were annotated using ANNOVAR [8]. Some of the candidate variants for Sanger sequencing were manually inspected using Integrative Genomics Viewer (IGV) [9]. Structural variations (SVs) were called using Meerkat [10] with default options and somatic SVs were filtered against all normal samples (n=10) to remove polymorphic SVs. Copy number variations (CNVs) were called using BIC-seq2 [11] (bin size: 100; lambda: 1000) and the BIC-seq2 results were used for estimating recurrent CNV regions using GISTIC2.0 [12] with default parameters.

##### Somatic variant detection in targeted-seq data

We called SNVs and indels using GATK HaplotypeCaller [2] and selected variants with a variant allele frequency (VAF) of 10% and the number of variant supporting reads of 10. We further filtered out variants present in dbSNP 142 [13], 1000 genomes project [14], ESP (exome sequencing project) [15], KRGDB (see URLs), or in-house 1000 Korean exome sequencing database. Furthermore, we selected missense variants predicted to have a functional consequence (*i.e.*, damaging or probably damaging) by at least two out of the three methods (SIFT [16], PolyPhen-2 [17], and Mutation Taster [18]). The prediction results were based on ANNOVAR [8] annotation. To identify samples with *TNFAIP3* homozygous deletion, we counted the number of reads aligned on *TNFAIP3* and normalized the count by dividing it by the total number of aligned reads for each sample. Samples with homozygous deletions were defined as those whose normalized read count is less than 2 standard deviations below the mean (Supplementary Table 6-2). Mutations in *TBL1XR1* (Figure 3A) were visualized using MutationMapper on cBioportal [19].

## Transcriptome analysis

We obtained canonical pathways from Molecular Signature Database [20] (MSigDB) and used single-sample Gene Set Enrichment analysis [21] (ssGSEA) to infer gene expression-based activity of the pathways. Hierarchical Clustering function in GenePattern [22] was utilized to perform clustering of the pathways with default options. FusionMap [23] and deFuse [24] were employed for detection of fusion genes. Normal MZB microarray expression data [25] (IgD+CD27+; n=10) were obtained from ArrayExpress [26] (accession number : E-MTAB-2246) and were combined with tumor RNA-seq data (n=10) using ComBat [27] with default options. GSEA pre-ranked algorithm [5] was run based on differentially expressed genes between *TBL1XR1*-mutant (n=1) and -wild-type samples (n=9) calculated by R package DEGseq [28] with MARS (ranked by z-score). For the microarray expression array data, we used the Diff\_of\_Classes metric for *TBL1XR1*-mutant (n=2) versus -wild-type samples (n=1) to assign a score and rank the genes. *NF-kB* and *JUN* target genes were obtained from TRRUST database [29].

## Clonality analysis

Clonal architecture was inferred based on heterozygous mutations in a region of copy number 2 using SciClone [30]. Mutations were classified as clonal and subclonal if their VAFs are the closest to dominant clone's central VAF and sub-clone's central VAF, respectively. Clones whose central VAF was less than a dominant clone's central VAF were only thought as sub-clones.

## URLs

PICARD: <http://broadinstitute.github.io/picard/>;  
KRGDB: <http://152.99.75.168/KRGDB/menuPages/intro.jsp>.

## REFERENCES

- Li H, Durbin R. Fast and accurate short read alignment with Burrows-Wheeler transform. *Bioinformatics*. 2009; 25: 1754-60. doi: 10.1093/bioinformatics/btp324.
- McKenna A, Hanna M, Banks E, Sivachenko A, Cibulskis K, Kernysky A, Garimella K, Altshuler D, Gabriel S, Daly M, DePristo MA. The Genome Analysis Toolkit: a MapReduce framework for analyzing next-generation DNA sequencing data. *Genome Res*. 2010; 20: 1297-303. doi: 10.1101/gr.107524.110.
- Li B, Dewey CN. RSEM: accurate transcript quantification from RNA-Seq data with or without a reference genome. *BMC Bioinformatics*. 2011; 12: 323. doi: 10.1186/1471-2105-12-323.
- Rosenbloom KR, Armstrong J, Barber GP, Casper J, Clawson H, Diekhans M, Dreszer TR, Fujita PA, Guruvadoo L, Haussler M, Harte RA, Heitner S, Hickey G, et al. The UCSC Genome Browser database: 2015 update. *Nucleic Acids Res*. 2015; 43: D670-81. doi: 10.1093/nar/gku1177.
- Subramanian A, Kuehn H, Gould J, Tamayo P, Mesirov JP. GSEA-P: a desktop application for Gene Set Enrichment Analysis. *Bioinformatics*. 2007; 23: 3251-3. doi: 10.1093/bioinformatics/btm369.
- Saunders CT, Wong WS, Swamy S, Becq J, Murray LJ, Cheetham RK. Strelka: accurate somatic small-variant calling from sequenced tumor-normal sample pairs. *Bioinformatics*. 2012; 28: 1811-7. doi: 10.1093/bioinformatics/bts271.
- Cibulskis K, Lawrence MS, Carter SL, Sivachenko A, Jaffe D, Sougnez C, Gabriel S, Meyerson M, Lander ES, Getz G. Sensitive detection of somatic point mutations in impure and heterogeneous cancer samples. *Nat Biotechnol*. 2013; 31: 213-9. doi: 10.1038/nbt.2514.
- Yang H, Wang K. Genomic variant annotation and prioritization with ANNOVAR and wANNOVAR. *Nat Protoc*. 2015; 10: 1556-66. doi: 10.1038/nprot.2015.105.
- Robinson JT, Thorvaldsdottir H, Winckler W, Guttman M, Lander ES, Getz G, Mesirov JP. Integrative genomics viewer. *Nat Biotechnol*. 2011; 29: 24-6. doi: 10.1038/nbt.1754.
- Yang L, Luquette LJ, Gehlenborg N, Xi R, Haseley PS, Hsieh CH, Zhang C, Ren X, Protopopov A, Chin L, Kucherlapati R, Lee C, Park PJ. Diverse mechanisms of somatic structural variations in human cancer genomes. *Cell*. 2013; 153: 919-29. doi: 10.1016/j.cell.2013.04.010.
- Xi R, Lee S, Xia Y, Kim TM, Park PJ. Copy number analysis of whole-genome data using BIC-seq2 and its application to detection of cancer susceptibility variants. *Nucleic Acids Res*. 2016. doi: 10.1093/nar/gkw491.
- Mermel CH, Schumacher SE, Hill B, Meyerson ML, Beroukhi R, Getz G. GISTIC2.0 facilitates sensitive and confident localization of the targets of focal somatic copy-number alteration in human cancers. *Genome Biol*. 2011; 12: R41. doi: 10.1186/gb-2011-12-4-r41.
- Sherry ST, Ward MH, Kholodov M, Baker J, Phan L, Smigielski EM, Sirotkin K. dbSNP: the NCBI database of genetic variation. *Nucleic Acids Res*. 2001; 29: 308-11. doi: 10.1093/nar/29.2.308.
- Genomes Project C, Abecasis GR, Auton A, Brooks LD, DePristo MA, Durbin RM, Handsaker RE, Kang HM, Marth GT, McVean GA. An integrated map of genetic variation from 1,092 human genomes. *Nature*. 2012; 491: 56-65. doi: 10.1038/nature11632.
- Fu W, O'Connor TD, Jun G, Kang HM, Abecasis G, Leal SM, Gabriel S, Rieder MJ, Altshuler D, Shendure J, Nickerson DA, Bamshad MJ, Project NES, et al. Analysis of 6,515 exomes reveals the recent origin of most human protein-coding variants. *Nature*. 2013; 493: 216-20. doi: 10.1038/nature11690.

16. Ng PC, Henikoff S. SIFT: Predicting amino acid changes that affect protein function. *Nucleic Acids Res.* 2003; 31: 3812-4.
17. Adzhubei I, Jordan DM, Sunyaev SR. Predicting functional effect of human missense mutations using PolyPhen-2. *Curr Protoc Hum Genet.* 2013; Chapter 7: Unit7 20. doi: 10.1002/0471142905.hg0720s76.
18. Schwarz JM, Rodelsperger C, Schuelke M, Seelow D. MutationTaster evaluates disease-causing potential of sequence alterations. *Nat Methods.* 2010; 7: 575-6. doi: 10.1038/nmeth0810-575.
19. Gao J, Aksoy BA, Dogrusoz U, Dresdner G, Gross B, Sumer SO, Sun Y, Jacobsen A, Sinha R, Larsson E, Cerami E, Sander C, Schultz N. Integrative analysis of complex cancer genomics and clinical profiles using the cBioPortal. *Sci Signal.* 2013; 6: p11. doi: 10.1126/scisignal.2004088.
20. Liberzon A, Subramanian A, Pinchback R, Thorvaldsdottir H, Tamayo P, Mesirov JP. Molecular signatures database (MSigDB) 3.0. *Bioinformatics.* 2011; 27: 1739-40. doi: 10.1093/bioinformatics/btr260.
21. Barbie DA, Tamayo P, Boehm JS, Kim SY, Moody SE, Dunn IF, Schinzel AC, Sandy P, Meylan E, Scholl C, Frohling S, Chan EM, Sos ML, et al. Systematic RNA interference reveals that oncogenic KRAS-driven cancers require TBK1. *Nature.* 2009; 462: 108-12. doi: 10.1038/nature08460.
22. Reich M, Liefeld T, Gould J, Lerner J, Tamayo P, Mesirov JP. GenePattern 2.0. *Nat Genet.* 2006; 38: 500-1. doi: 10.1038/ng0506-500.
23. Ge H, Liu K, Juan T, Fang F, Newman M, Hoek W. FusionMap: detecting fusion genes from next-generation sequencing data at base-pair resolution. *Bioinformatics.* 2011; 27: 1922-8. doi: 10.1093/bioinformatics/btr310.
24. McPherson A, Hormozdiari F, Zayed A, Giuliany R, Ha G, Sun MG, Griffith M, Heravi Moussavi A, Senz J, Melnyk N, Pacheco M, Marra MA, Hirst M, et al. deFuse: an algorithm for gene fusion discovery in tumor RNA-Seq data. *PLoS Comput Biol.* 2011; 7: e1001138. doi: 10.1371/journal.pcbi.1001138.
25. Descatoire M, Weller S, Irtan S, Sarnacki S, Feuillard J, Storck S, Guiochon-Mantel A, Bouligand J, Morali A, Cohen J, Jacquemin E, Iacone M, Bole-Feysot C, et al. Identification of a human splenic marginal zone B cell precursor with NOTCH2-dependent differentiation properties. *J Exp Med.* 2014; 211: 987-1000. doi: 10.1084/jem.20132203.
26. Rustici G, Kolesnikov N, Brandizi M, Burdett T, Dylag M, Emam I, Farne A, Hastings E, Ison J, Keays M, Kurbatova N, Malone J, Mani R, et al. ArrayExpress update--trends in database growth and links to data analysis tools. *Nucleic Acids Res.* 2013; 41: D987-90. doi: 10.1093/nar/gks1174.
27. Johnson WE, Li C, Rabinovic A. Adjusting batch effects in microarray expression data using empirical Bayes methods. *Biostatistics.* 2007; 8: 118-27. doi: 10.1093/biostatistics/kxj037.
28. Wang L, Feng Z, Wang X, Wang X, Zhang X. DEGseq: an R package for identifying differentially expressed genes from RNA-seq data. *Bioinformatics.* 2010; 26: 136-8. doi: 10.1093/bioinformatics/btp612.
29. Han H, Shim H, Shin D, Shim JE, Ko Y, Shin J, Kim H, Cho A, Kim E, Lee T, Kim H, Kim K, Yang S, et al. TRRUST: a reference database of human transcriptional regulatory interactions. *Sci Rep.* 2015; 5: 11432. doi: 10.1038/srep11432.
30. Miller CA, White BS, Dees ND, Griffith M, Welch JS, Griffith OL, Vij R, Tomasson MH, Graubert TA, Walter MJ, Ellis MJ, Schierding W, DiPersio JF, et al. SciClone: inferring clonal architecture and tracking the spatial and temporal patterns of tumor evolution. *PLoS Comput Biol.* 2014; 10: e1003665. doi: 10.1371/journal.pcbi.1003665.

**Supplementary Table 1: Clinical information of patients**

See Supplementary File 1

**Supplementary Table 2-1: Summary of WGS and Targeted-seq QC**

**Supplementary Table 2-2: Summary of RNA-seq QC**

See Supplementary File 1

**Supplementary Table 3: List of identified CNVs**

See Supplementary File 1

**Supplementary Table 4: Identified significant regions from GISTIC analysis**


---

|                      |                          |
|----------------------|--------------------------|
| cytoband             | 6q23.3                   |
| q value              | 0.0010219                |
| residual q value     | 0.0010219                |
| wide peak boundaries | chr6:137341112-139809220 |
| genes in wide peak   | hsa-mir-3145             |
|                      | IFNGR1                   |
|                      | TNFAIP3                  |
|                      | CITED2                   |
|                      | HEBP2                    |
|                      | CCDC28A                  |
|                      | HECA                     |
|                      | IL20RA                   |
|                      | KIAA1244                 |
|                      | NHSL1                    |
|                      | C6orf115                 |
|                      | PBOV1                    |
|                      | PERP                     |
|                      | REPS1                    |
|                      | IL22RA2                  |
|                      | OLIG3                    |
|                      | TXLNB                    |
|                      | ECT2L                    |
|                      | FLJ46906                 |
|                      | LOC645434                |
|                      | MIR3145                  |
|                      | LOC100507462             |

---

**Supplementary Table 5: List of identified SNVs**

See Supplementaty File 1



**Supplementary Table 6-1: Clonality analysis**

**Supplementary Table 6-2: Aligned reads in A20 from Targeted-seq**

See Supplementaty File 1

Supplementary Table 7: List of gene-specific PCR primers and oligo sequence

| Type            | Set. No    | Primer Name                     | Sequence                                               |
|-----------------|------------|---------------------------------|--------------------------------------------------------|
| gDNA PCR primer | Set 1      | gDNA 1 F                        | 5'-GCCACAAGAGGAATGACAACC-3'                            |
|                 |            | gDNA 1 R                        | 5'-CCGAGGGATATGCATCCATAACC-3'                          |
|                 |            | gDNA 1 seq                      | 5'-GGAATGACAACCAAATGGTGAGG-3'                          |
|                 | Set 2      | gDNA 2 F                        | 5'-GGCCAGAGCAACCATACTGTG-3'                            |
|                 |            | gDNA 2 R                        | 5'-CAAGTAGCTACCCAGTCTATACAATG-3'                       |
|                 |            | gDNA 2 seq                      | 5'-GAGCAACCATACTGTGTGACAC-3'                           |
| Set 3           | gDNA 3 F   | 5'-AACATTACTTGTTAATCATGACCAC-3' |                                                        |
|                 | gDNA 3 R   | 5'-GGATGTTGATTGGCAGAGCAAC-3'    |                                                        |
|                 | gDNA 3 seq | 5'-GCAACAACACCTTTGCTTCTTG-3'    |                                                        |
| Set4            | gDNA 4 F   | 5'-GGAATGTTTATGTAATTGGCAGC-3'   |                                                        |
|                 | gDNA 4 R   | 5'-GGTAACCTTGCTAGCACCTTAGG-3'   |                                                        |
|                 | gDNA 4 seq | 5'-GGCAGCTAAGACAAAATACTGC-3'    |                                                        |
| Set5            | gDNA 5 F   | 5'-CCCTGCCGTGAGTATGAGGCTC-3'    |                                                        |
|                 | gDNA 5 R   | 5'-GTGAGAACAGCACCCAGTGGCTC-3'   |                                                        |
|                 | gDNA 5 seq | 5'-GTATGAGGCTCTGAGGGTTAGG-3'    |                                                        |
| Set6            | gDNA 6 F   | 5'-GGCCACAACCTAAGCAACAACAG-3'   |                                                        |
|                 | gDNA 6 R   | 5'-GGCCACAACCTAAGCAACAACAG-3'   |                                                        |
|                 | gDNA 6 seq | 5'-CAACAACAGAAAACCTGAATAATGC-3' |                                                        |
| siRNA oligo     | si-TBL1XR1 | Sense<br>Anti-sense             | GAGGUAGAUGUUUGGUACA(dTdT)<br>UGUACCAAACAUCUACCUC(dTdT) |

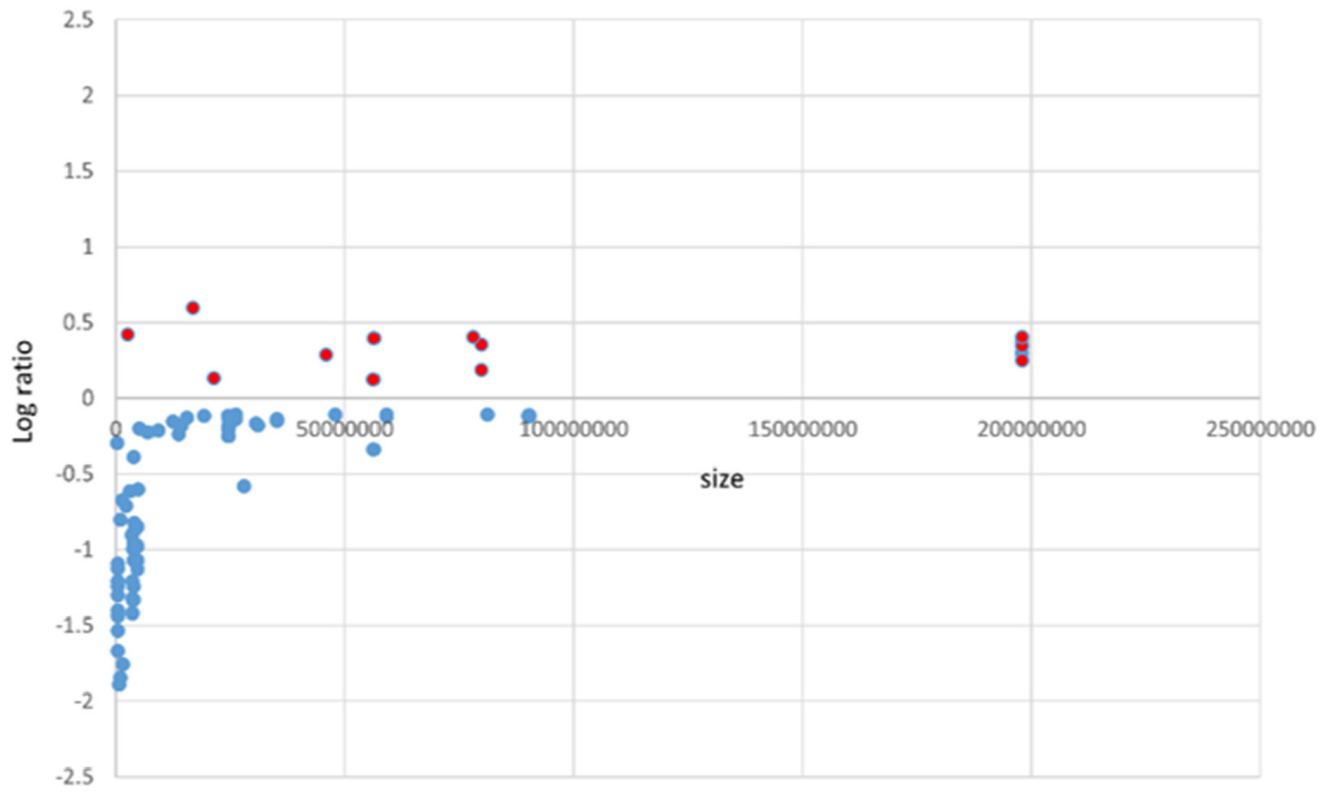

**Supplementary Figure 1: Size and amplitude of identified copy number variants.** The red circle represents amplification (log ratio > 0.1) while the blue one represent deletion (log ratio < -0.1).

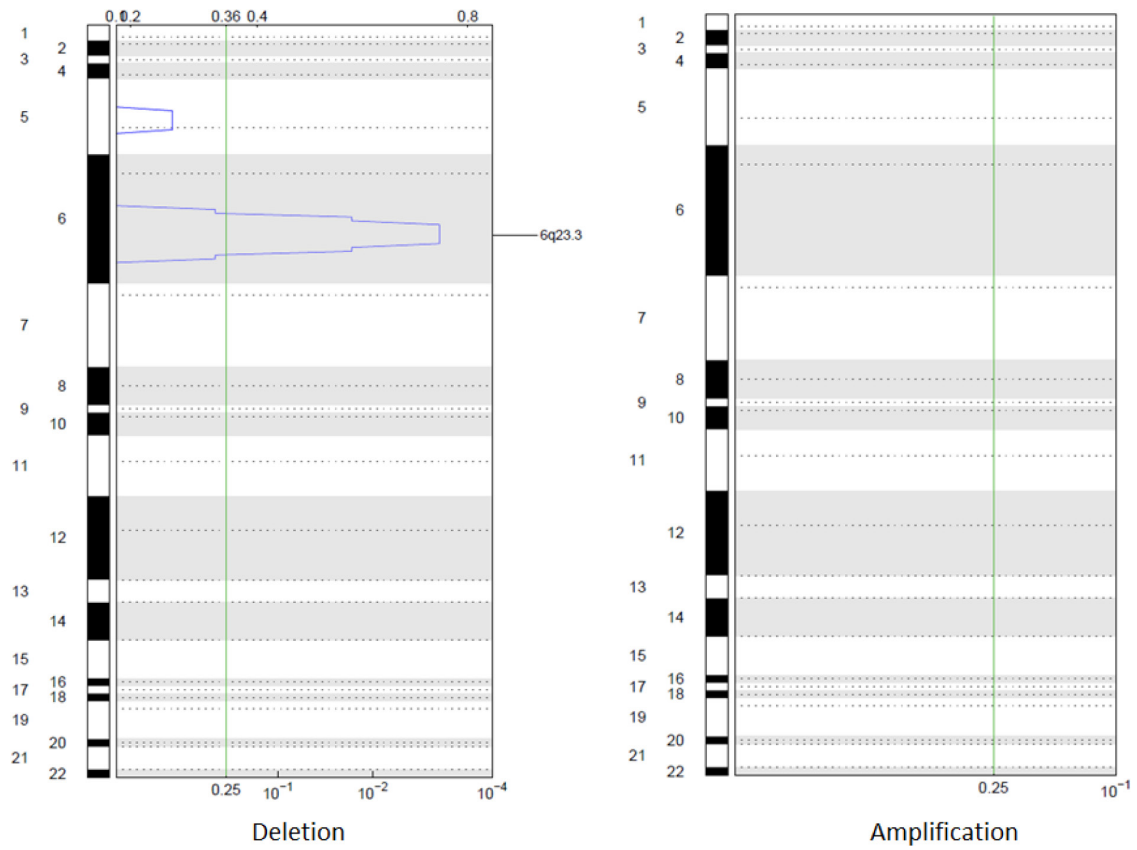

**Supplementary Figure 2: Significant peaks of deletion and amplification identified by GISTIC.** The green line denotes FDR values < 0.25.

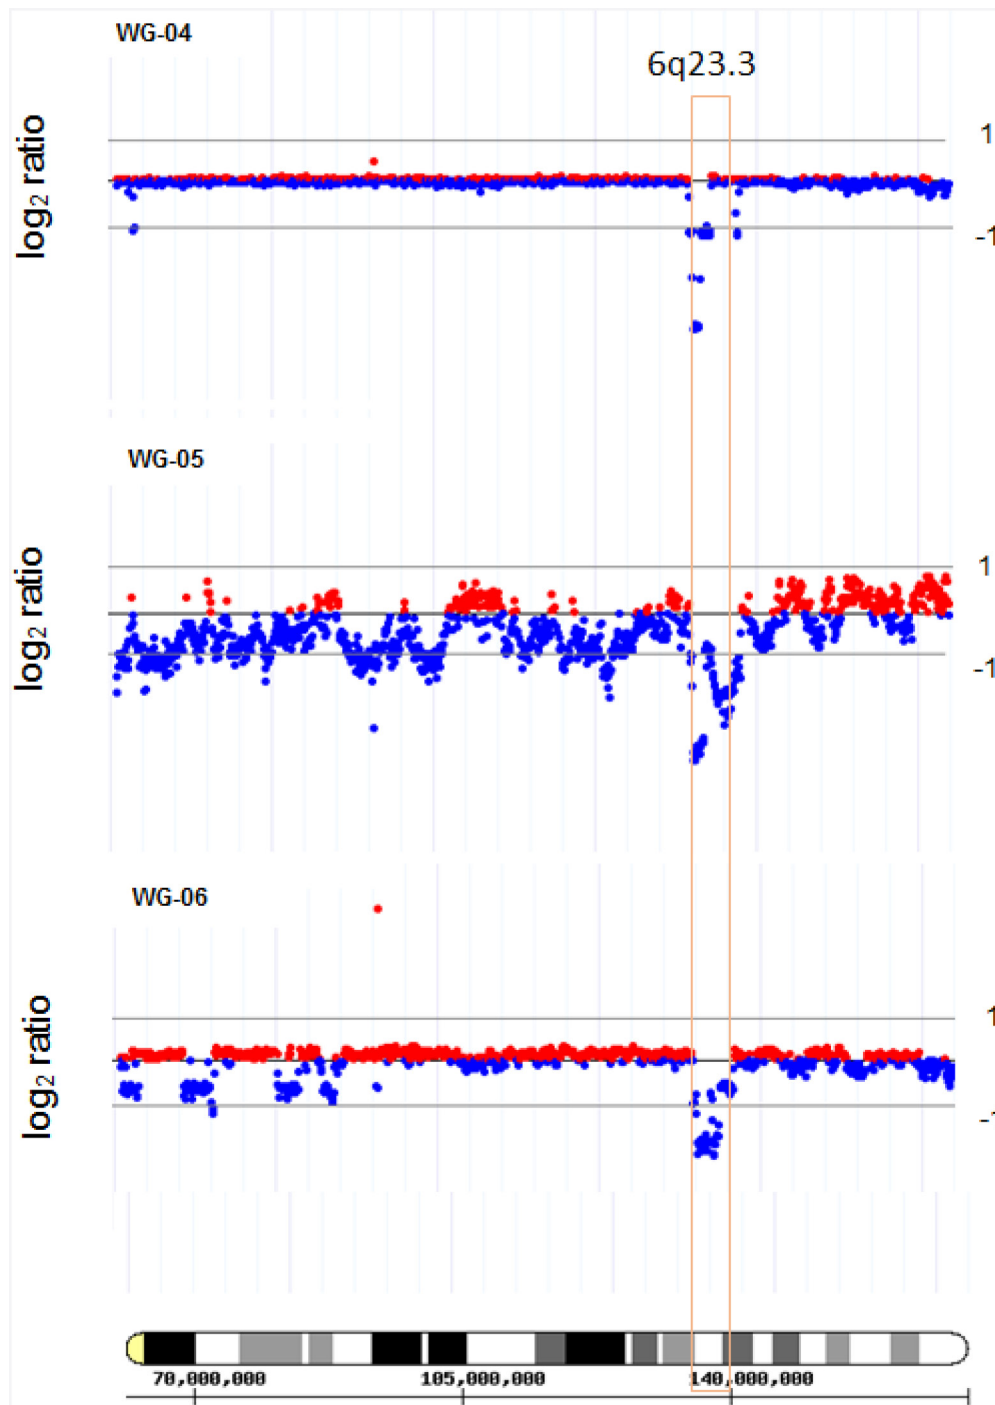

Supplementary Figure 3: Log<sub>2</sub> ratio of copy number for samples (WG-04, -05, and -06) displaying homozygous deletion of *TNFAIP3*. The orange box denotes 6q23.3.

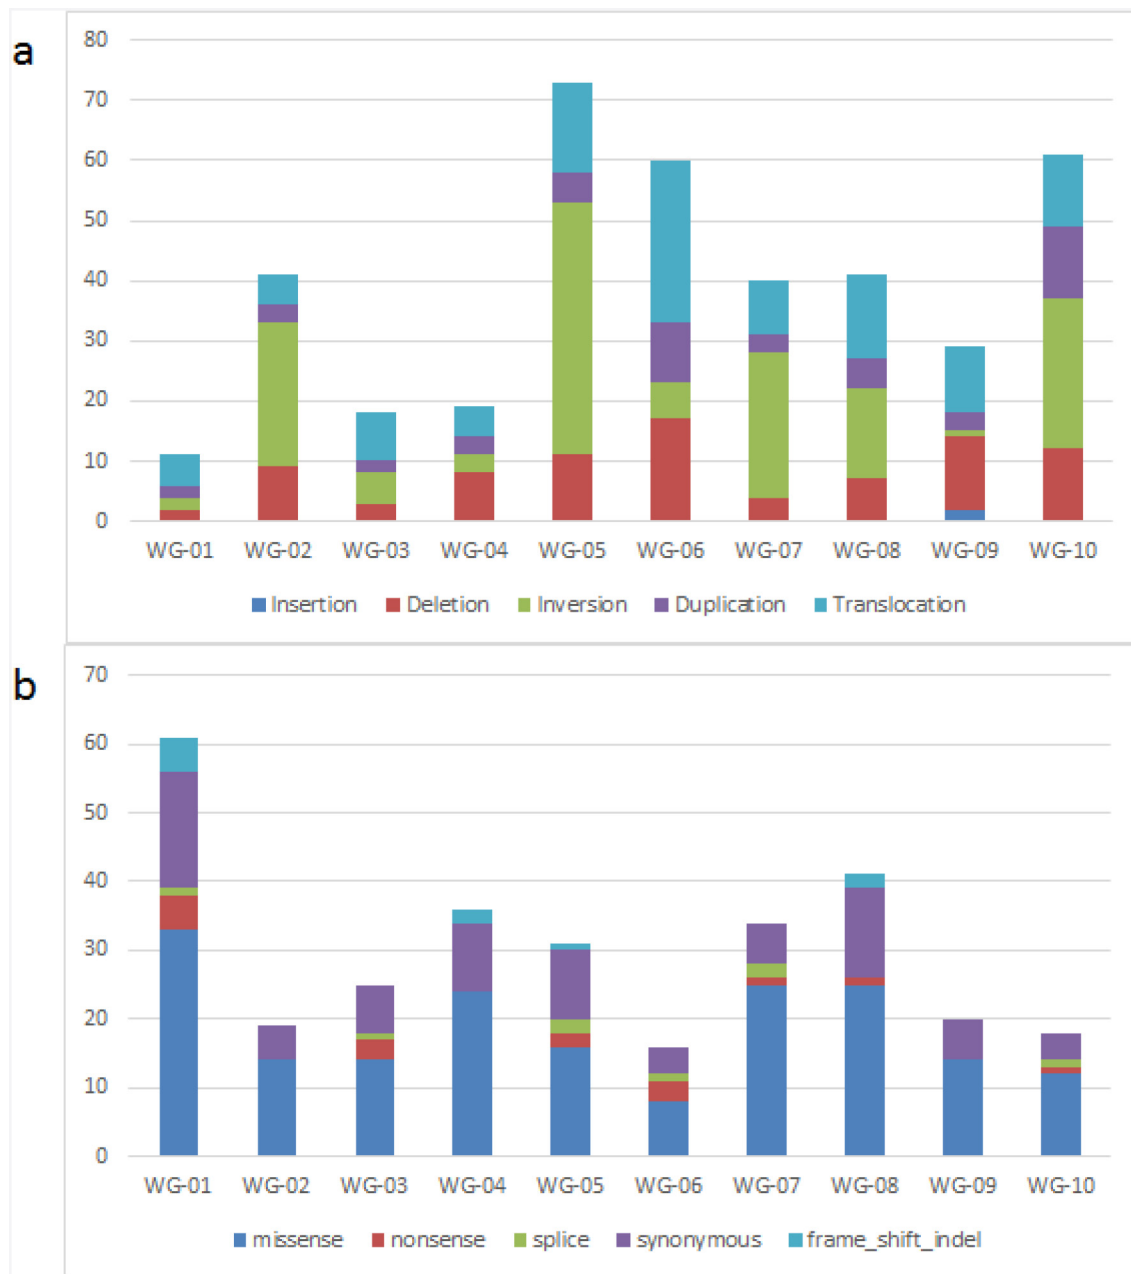

Supplementary Figure 4: Summary statistics of identified somatic structural variations a. and single nucleotide variants b.

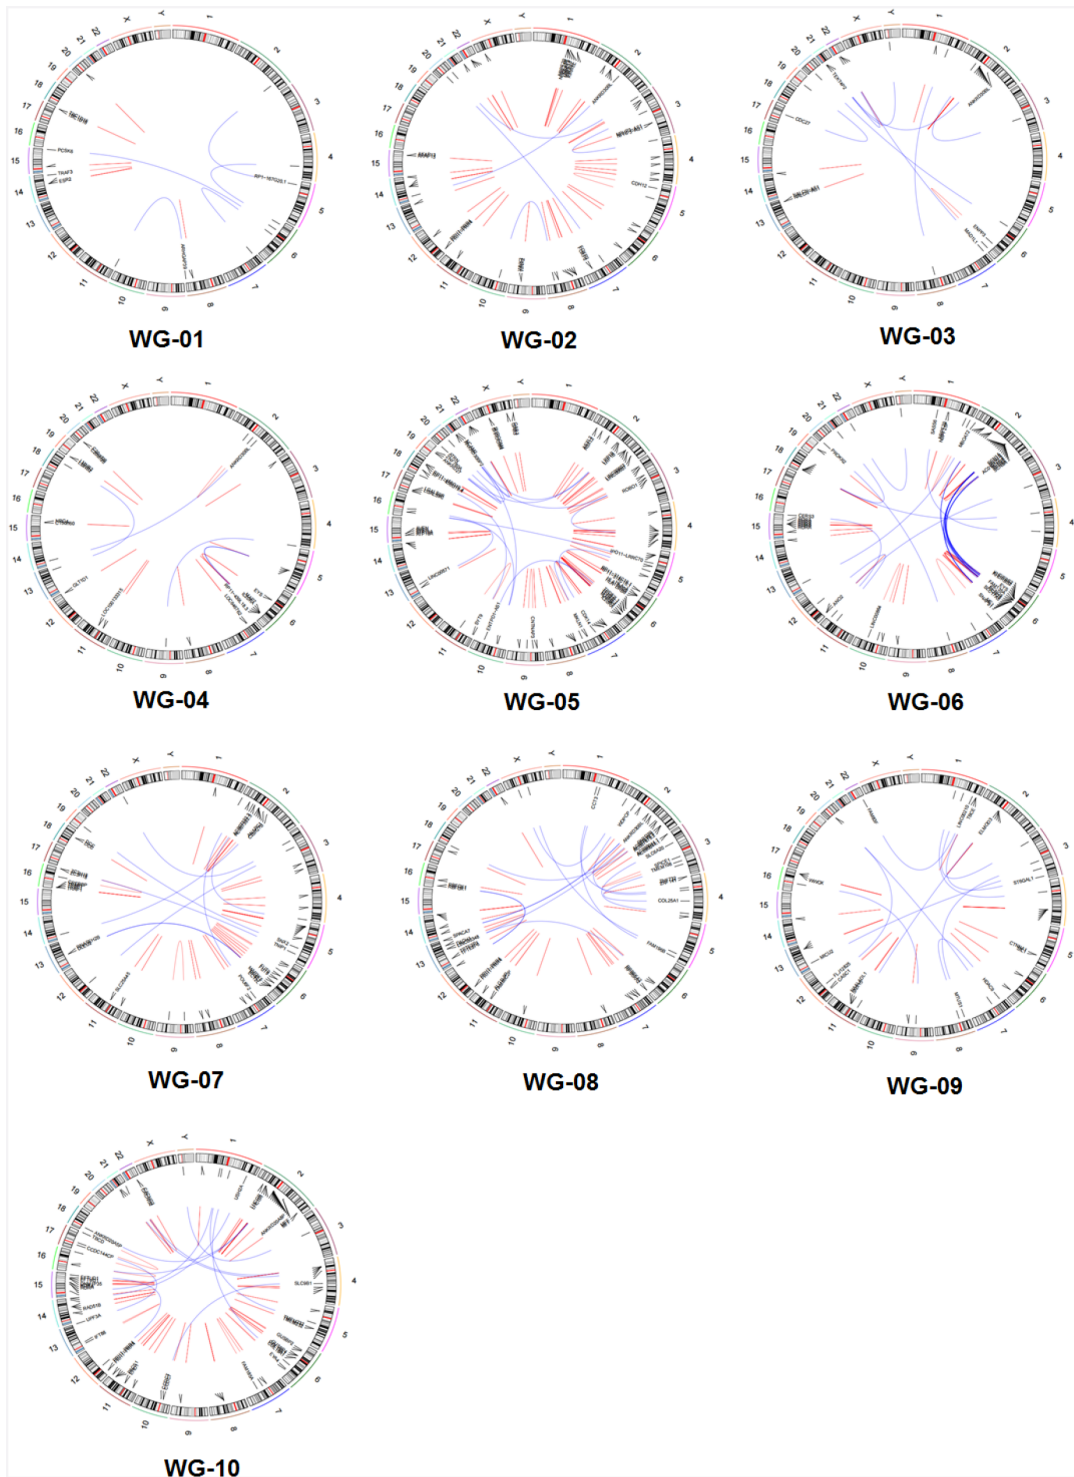

Supplementary Figure 5: Circos plot for the identified structural variations.

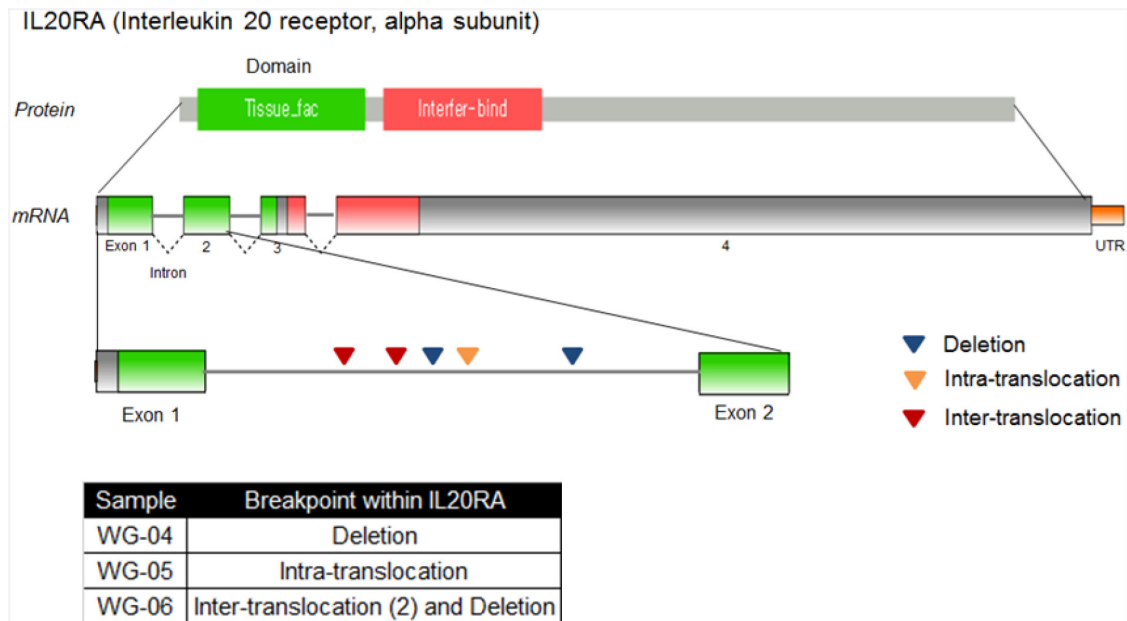

Supplementary Figure 6: Clustered breakpoints in intron 1 of IL20RA.



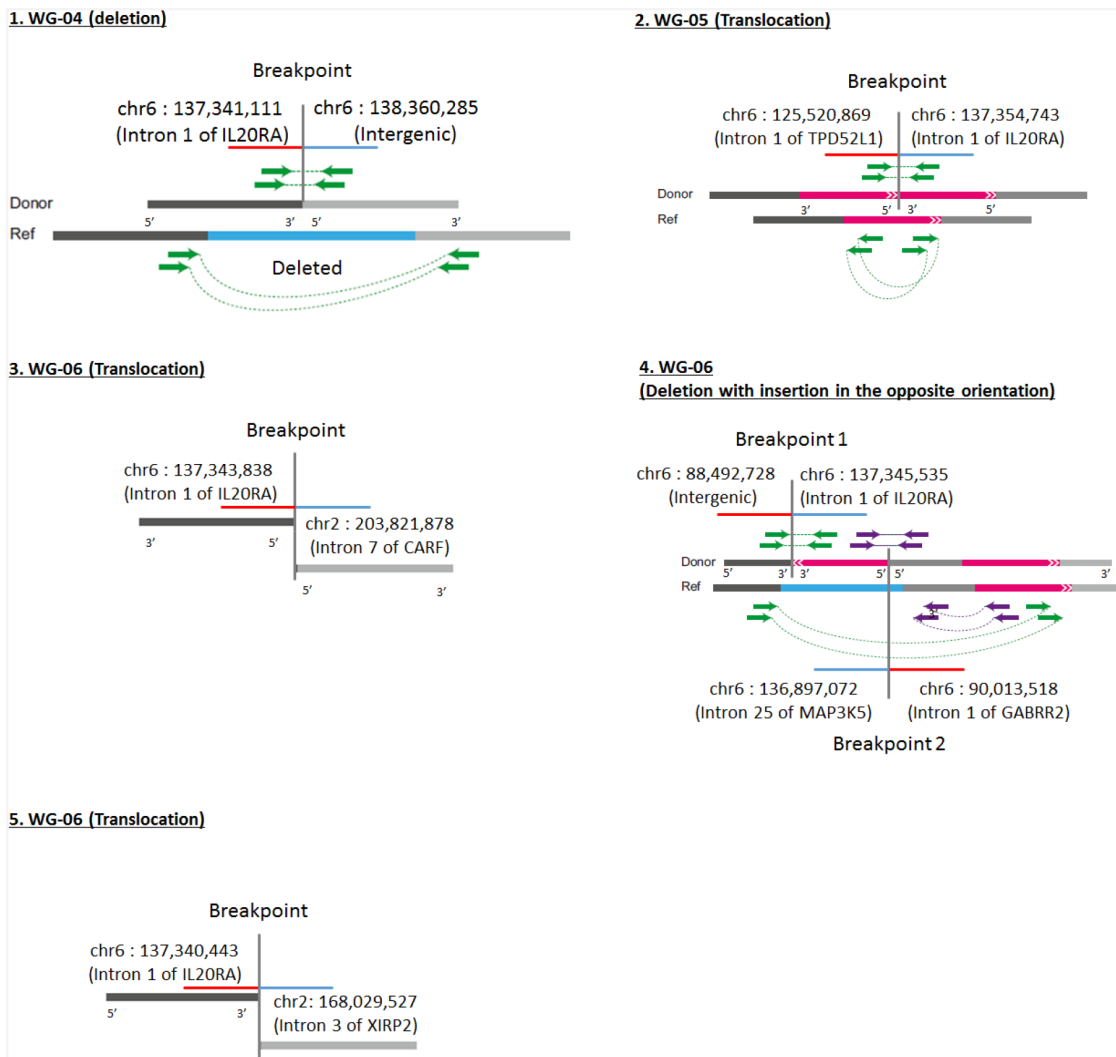

Supplementary Figure 7: Details of breakpoints in intron 1 of IL20RA.

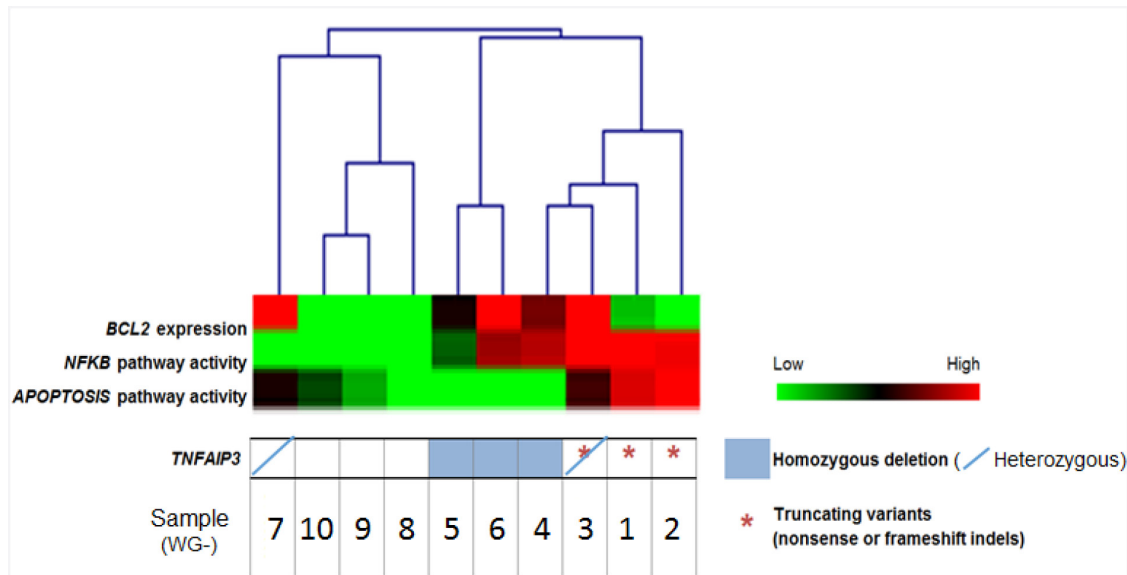

**Supplementary Figure 8: Pathway-based hierarchical clustering of expression profiling.** ssGSEA was used to calculate enrichment score of *NFKB* and *APOPTOSIS* pathways from BioCarta for each sample. The expression values were normalized per gene by z-score transformation.

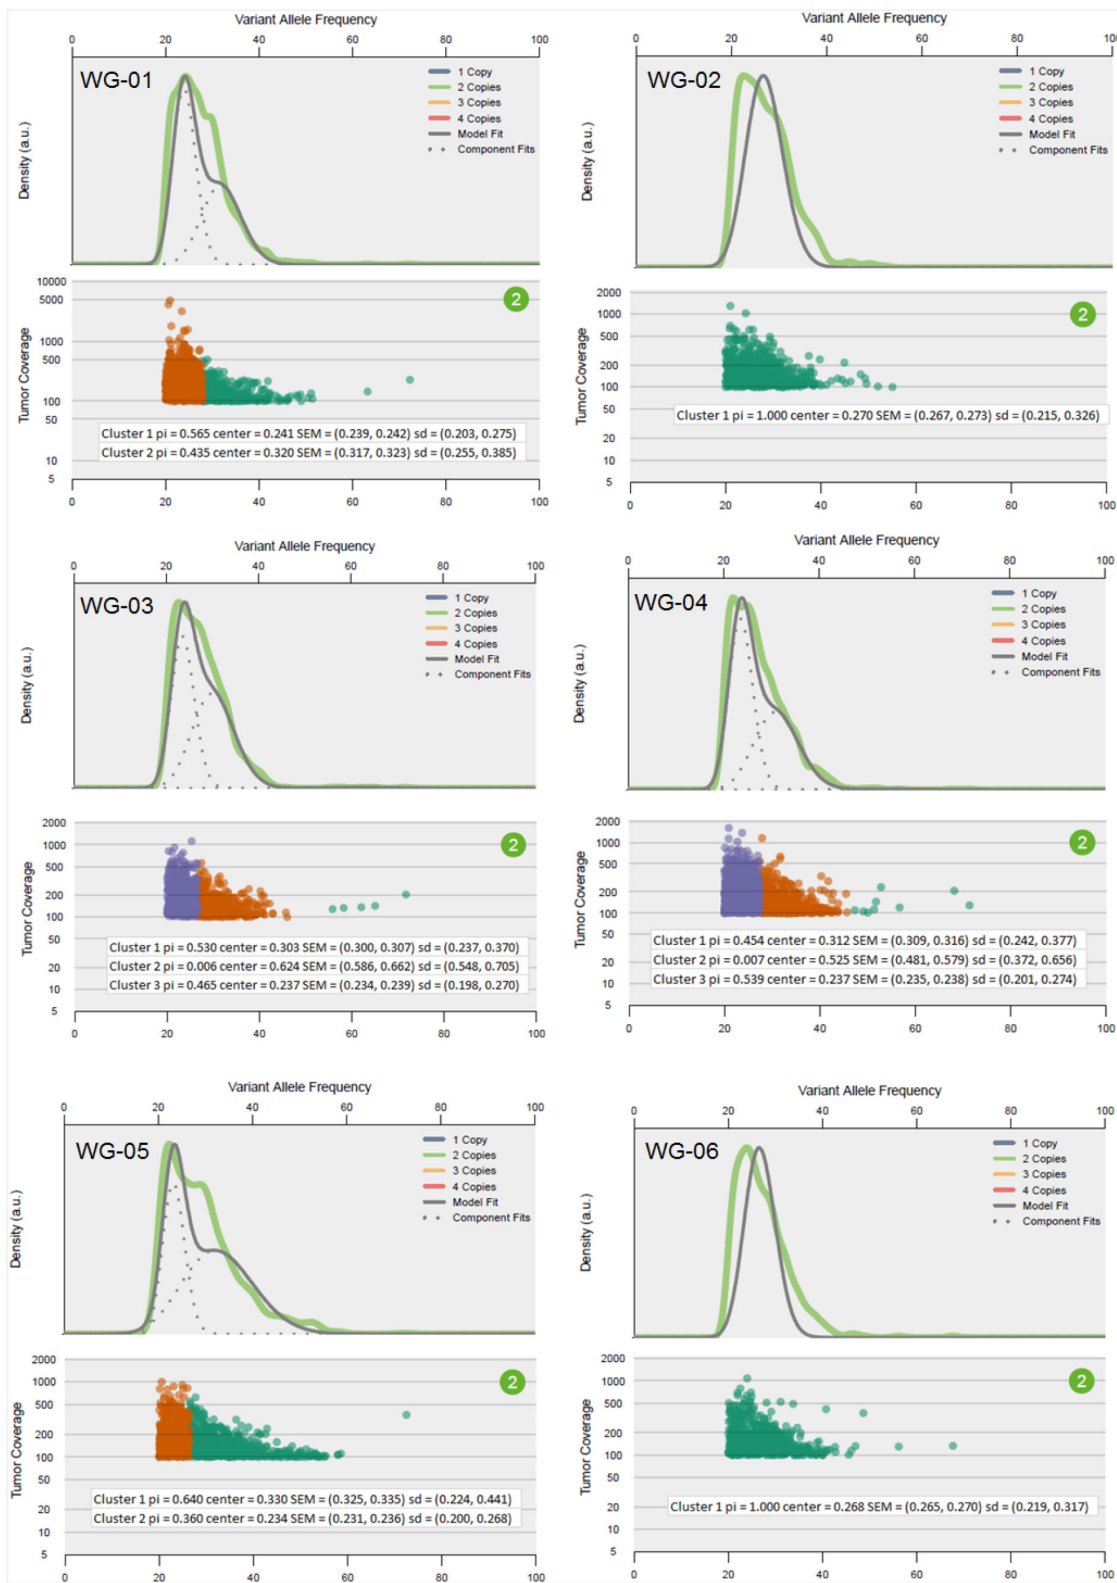

(Continued)

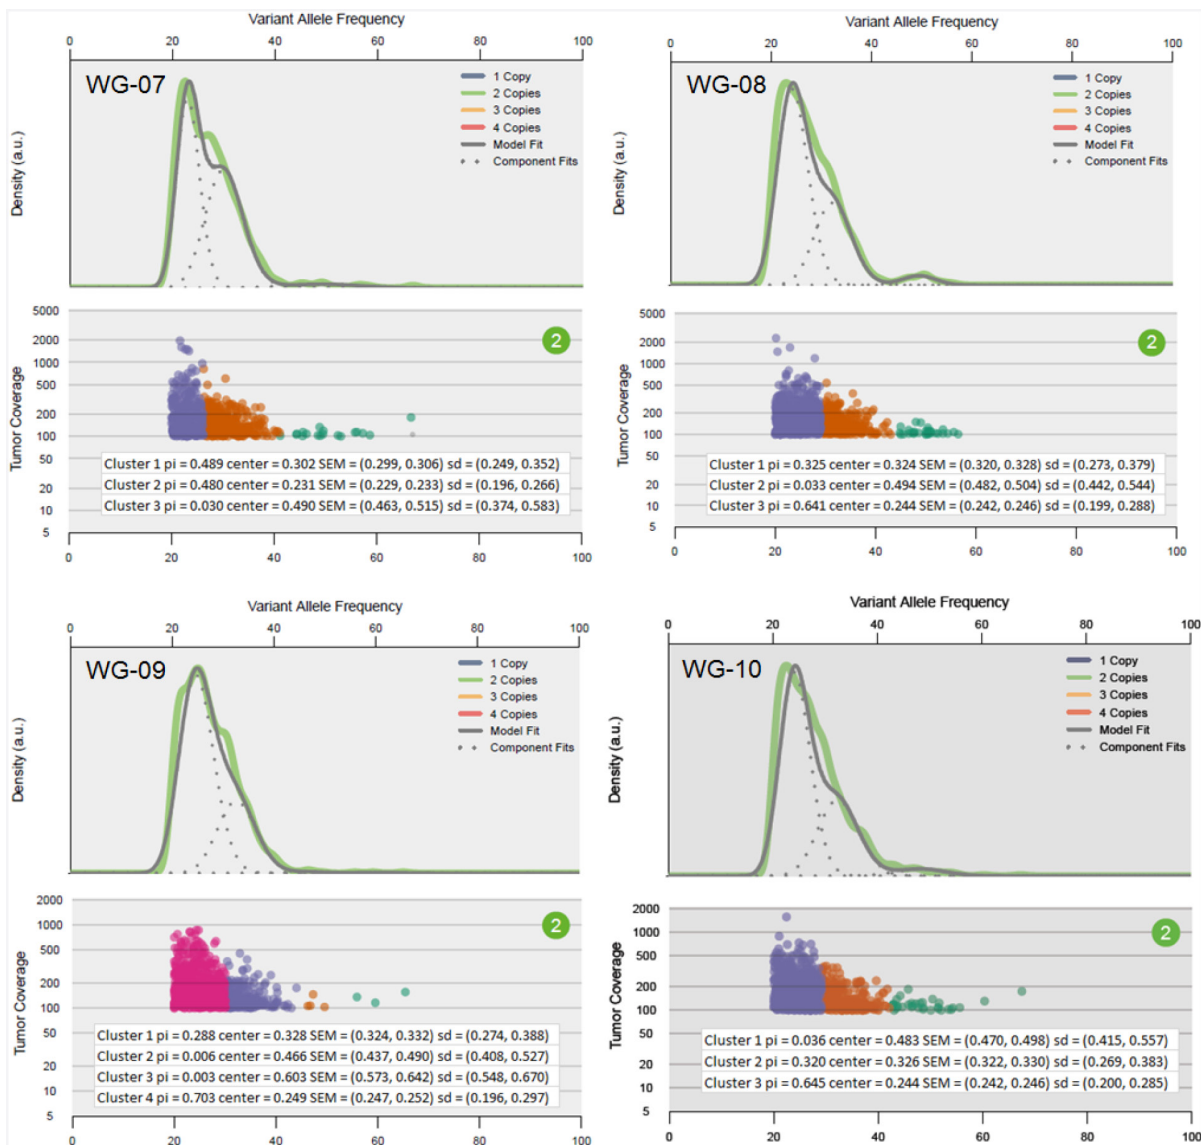

**Supplementary Figure 9: Clonal architecture of tumors.** We inferred clonal architecture of tumors with VAF (variant allele frequency) of heterozygous mutations in a region of copy number 2 using SciClone.

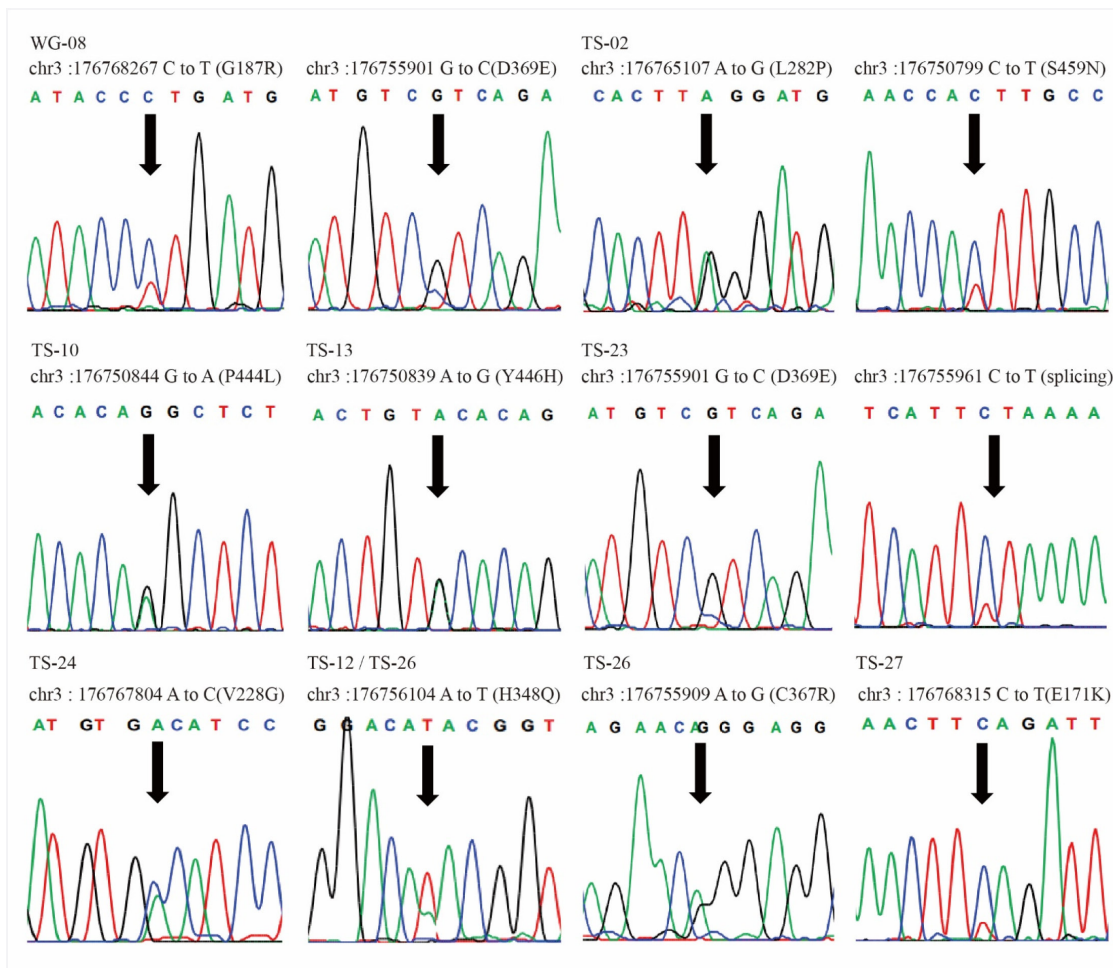

**Supplementary Figure 10: Patial genomic DNA sequencing traces of TBL1XR1 mutation in Extranodal Marginal Zone Lymphoma(EMZL) patients.** Patient ID and location of TBL1XR1 mutation is indicated above the chromas. The arrows show the site which the base change was occurred. The chromatograms of each patients indicate different mutation of TBL1XR1 and heterozygous type in each patients.

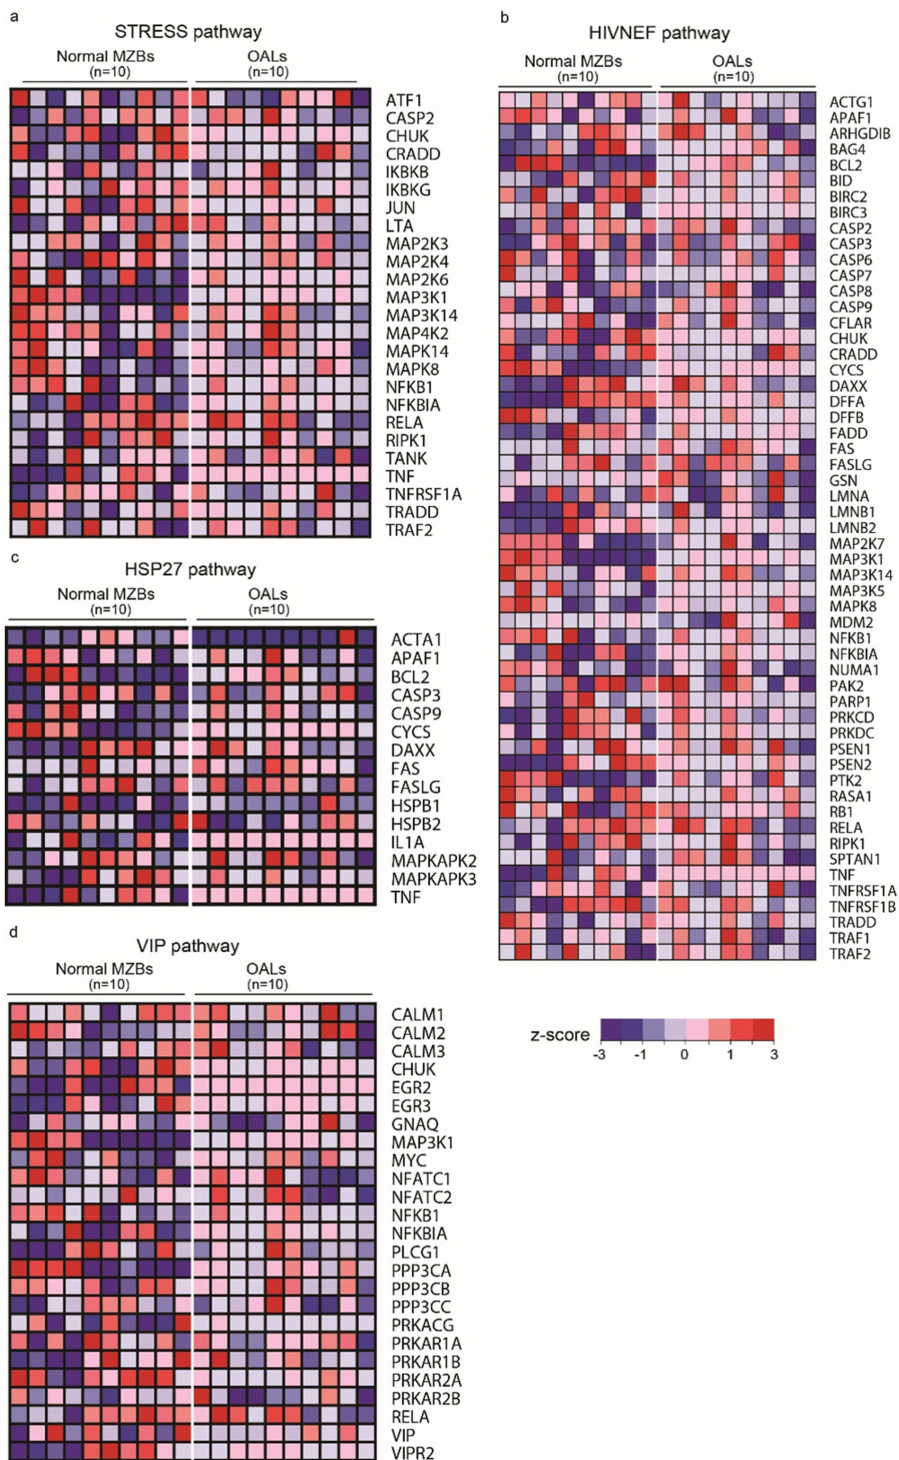

(Continued)

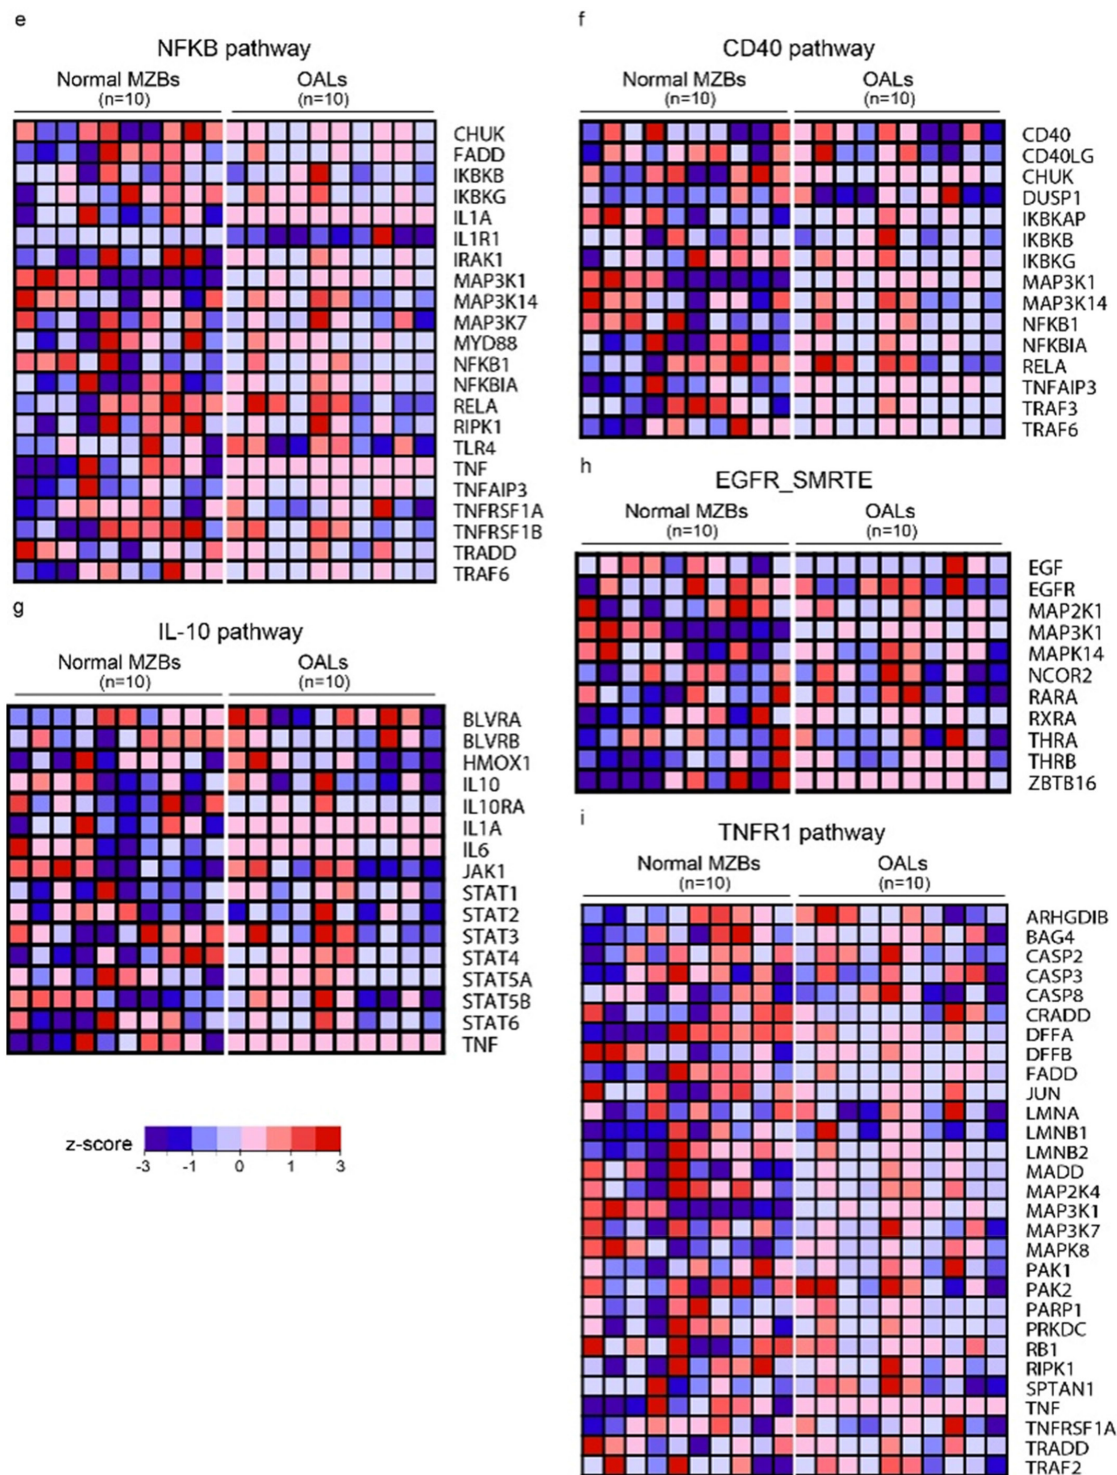

**Supplementary Figure 11: Heatmap of genes in differentially expressed pathways in Figure 4.** The expression values were normalized per gene by z-score transformation.

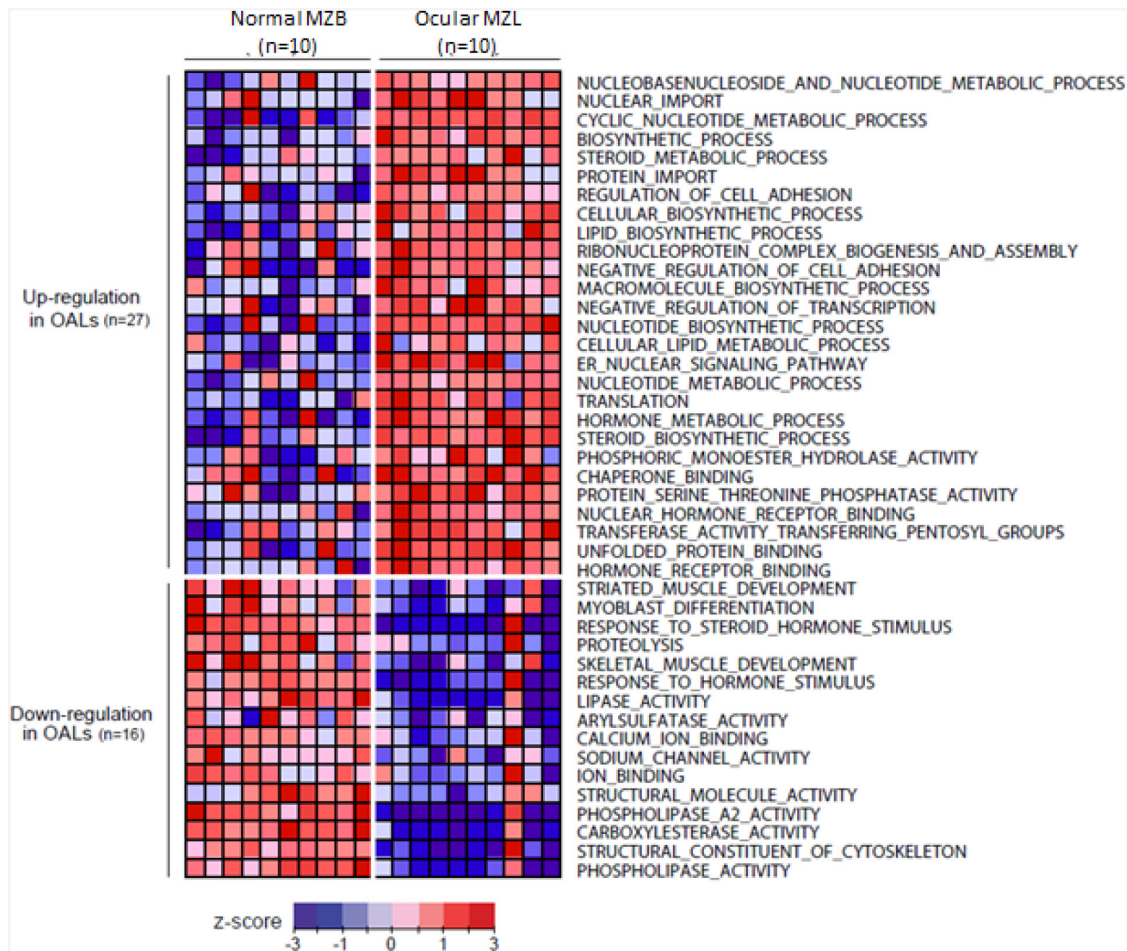

**Supplementary Figure 12: Enriched gene ontology terms.** ssGSEA was used to calculate enrichment score for each sample and significantly different GO terms between normal MZBs and ocular MZL were plotted (p value < 0.01, t-test). The expression values were normalized per gene by z-score transformation.
